# Supplementary material for: A systematic genomic screen implicates nucleocytoplasmic transport and membrane growth in nuclear size control
Source: PLoS Genet. 2017 May 18;13(5):e1006767. doi: 10.1371/journal.pgen.1006767 (PMC5436639; doi:10.1371/journal.pgen.1006767)
Supplement: S3 Table — (DOCX) [file pgen.1006767.s005.docx]

**S3 Table. Nucleus-localised proteins are enriched and cytosol-localised proteins depleted in nuclear enriched samples**

| Strain | 2D enrichment analysis of average log2 nuclear enriched/whole cell ratiosa | | |
| --- | --- | --- | --- |
| Annotation categoryb | 2D enrichment score | P value |
| WT (36°C) | Nucleus-localised | 0.12 | 0.017 |
| Cytosol-localised | - 0.11 | 0.005 |
| *rae1-167* (36°C) | Nucleus-localised | 0.18 | 0.006 |
| Cytosol-localised | - 0.12 | 0.00002 |

a2D enrichment analysis [21] of average log2 nuclear enriched/whole cell ratios from SILAC comparison of nuclear enriched sample to whole cell sample to confirm nuclear enrichment by nuclear enrichment protocol (see supplemental experimental procedures)

bNucleus-localised and cytosol-localised categories from *S. pombe* ORFeome localisation data [19]
